# Supplementary material for: Spermidine Mitigates Immune Cell Senescence, Enhances Autophagy, and Boosts Vaccine Responses in Healthy Older Adults.
Source: Research Square preprint supplement (doi:10.21203/rs.3.rs-5686388/v1), 2025-04-02
Supplement: Supplementary file 2 [file 0d7a6d3409239c2247824a21.docx]

**Table 4: List of antibodies and reagents.**

| **Antibody name** | **Description** | **Clone** | **Fluorophore** | **Source** | **Code/Catalogue number** |
| --- | --- | --- | --- | --- | --- |
| CD3 | Surface marker for T cells | UCHT1 | BUV395 | BD Biosciences | 563546 |
| CD11c | Surface marker for myeloid cells | B-ly6 | BUV496 | BD Biosciences | 741139 |
| CD45RA | Surface marker for T cells | HI100 | BUV563 | BD Biosciences | 612927 |
| CD19 | Surface marker for B cells | SJ25C1 | BUV615 | BD Biosciences | 612990 |
| CD28 | Surface marker for T cells | CD28.2 | BUV661 | BD Biosciences | 741635 |
| HLA-DR | Surface marker for monocytes | L203.rMAb | BUV737 | BD Biosciences | 752496 |
| CD57 | Surface marker for T cells and NK cells | NK-1 | BV421 | BD Biosciences | 563896 |
| NKG2A | Surface marker for NK cells | S19004C | Pacific Blue | BioLegend | 375110 |
| IgD | Surface marker for B cells | IA6-2 | BV480 | BD Biosciences | 566187 |
| CD45RO | Surface marker for T cells | UCHL1 | BV510 | BioLegend | 304245 |
| CD56 | Surface marker for NK cells | HCD56 | BV570 | BioLegend | 318329 |
| CD27 | Surface marker for T cells and B cells | O323 | BV650 | BioLegend | 302827 |
| KLRG1 | Surface marker for T cells | 2F1/KLRG1 | BV785 | BioLegend | 138429 |
| CCR7 | Surface marker for T cells | G043H7 | PerCP-Cy5.5 | BioLegend | 353219 |
| CD16 | Surface marker for monocytes | [3G8](https://www.biolegend.com/en-us/search-results?Clone=3G8) | PE-Dazzle594 | BioLegend | 302053 |
| CD127 | Surface marker for T cells | A019D5 | PE-Fire 700 | BioLegend | 351365 |
| CD4 | Surface marker for T cells | SK3 | PE-Fire 810 | BioLegend | 344677 |
| CD8 | Surface marker for T cells | HIT8a | APC-Cy7 | BioLegend | 300925 |
| CD14 | Surface marker for B cells and monocytes | 63D3 | APC-Fire 810 | BioLegend | 367155 |
| Perforin | Intracellular marker | B-D48 | PE-Cy7 | BioLegend | 353316 |
| Granzyme B | Intracellular marker | GB11 | PE | eBioscience | 12-8899-41 |
| IFNγ | Intracellular marker | 4S.B3 | Ef506 | ThermoFisher | 69-7319-42 |
| TNFα | Intracellular marker | MAb11 | FITC | BioLegend | 502906 |
| IL-2 | Intracellular marker | MQ1-17H12 | BV650 | BioLegend | 500333 |
| Phospho-S-6 | Intracellular marker | cupk43k | APC | ThermoFisher Scientific | 417-9007-42 |
| P21 | Intracellular marker | 12D1 | Alexa Fluor® 594 | Cell Signaling | 11850 |
| P16 | Intracellular marker | EPR1473 | PE | abcam | ab209579 |
| γH2Ax | Intracellular marker | N1-431 | PerCP-Cy™5.5 | BD Biosciences | 564718 |
