# Supplementary material for: Spermidine Mitigates Immune Cell Senescence, Enhances Autophagy, and Boosts Vaccine Responses in Healthy Older Adults.
Source: Research Square preprint supplement (doi:10.21203/rs.3.rs-5686388/v1), 2025-04-02
Supplement: Supplementary file 3 [file 3effd1472df4f7cc57969f94.docx]

**Table 1**: Study enrolment and baseline characteristics of participant cohort.
