# Supplementary material for: Spermidine Mitigates Immune Cell Senescence, Enhances Autophagy, and Boosts Vaccine Responses in Healthy Older Adults.
Source: Research Square preprint supplement (doi:10.21203/rs.3.rs-5686388/v1), 2025-04-02
Supplement: Supplementary file 5 [file 5a663ad19d1f67776014bf97.docx]

**Table 2**: Study enrolment and baseline characteristics of G1 and G2 participants.
